# Supplementary material for: Preparation of an amino acid-based polymer monolith for trimodal liquid chromatography
Source: Royal Society of Chemistry journal article supplement (doi:10.1039/c5ra12203a), 2015-01-01
Supplement: c5ra12203a1.pdf [file c5ra12203a1.pdf]

## Supporting Information

### Preparation of amino acid-based polymer monolith for trimodal liquid chromatography

Nan Li,<sup>a,b</sup> Yong Shen,<sup>a,b</sup> Li Qi,<sup>\* a</sup> Zhibo Li<sup>a</sup>, Juan Qiao<sup>a</sup> and Yi Chen<sup>a</sup>

<sup>a</sup> *Beijing National Laboratory for Molecular Sciences; Key Laboratory of Analytical Chemistry for Living Biosystems, Institute of Chemistry, Chinese Academy of Sciences, Beijing 100190, P. R. China*

<sup>b</sup> *Graduate School, University of Chinese Academy of Sciences, Beijing 100049, P. R. China*

\* Correspondence: [qili@iccas.ac.cn](mailto:qili@iccas.ac.cn)

**Table S1.** Mechanical properties and back pressures of monoliths with different preparative compositions

| <b>Column</b>                           | <b>1</b>       | <b>2</b>          | <b>3</b>       | <b>4</b>     | <b>5</b>          |
|-----------------------------------------|----------------|-------------------|----------------|--------------|-------------------|
| <b>MA-L-Phe-OMe (mg)</b>                | 200.0          | 200.0             | 0              | 100.0        | 300.0             |
| <b>MBA (mg)</b>                         | 300.0          | 300.0             | 500.0          | 400.0        | 200.0             |
| <b>Dodecanol (mL)</b>                   | 0.3            | 2.0               | 2.0            | 2.0          | 2.0               |
| <b>DMSO (mL)</b>                        | 1.8            | 1.8               | 1.8            | 1.8          | 1.8               |
| <b>Mechanical properties</b>            | Extremely hard | Quit hard, fluffy | Extremely soft | Hard, fluffy | Quit hard, fluffy |
| <b><sup>a</sup> Back pressure (MPa)</b> | >18.0          | 7.1               | 1.4            | 1.7          | >18.0             |

<sup>a</sup> Measured at the flow rate of 1.0 mL/min with water as the mobile phase.

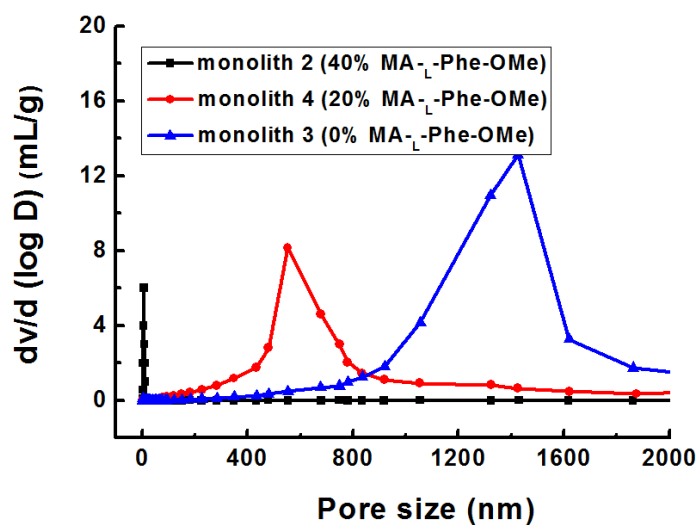

**Fig. S1.** Pore size distributions of monolith 2, monolith 3 and monolith 4.

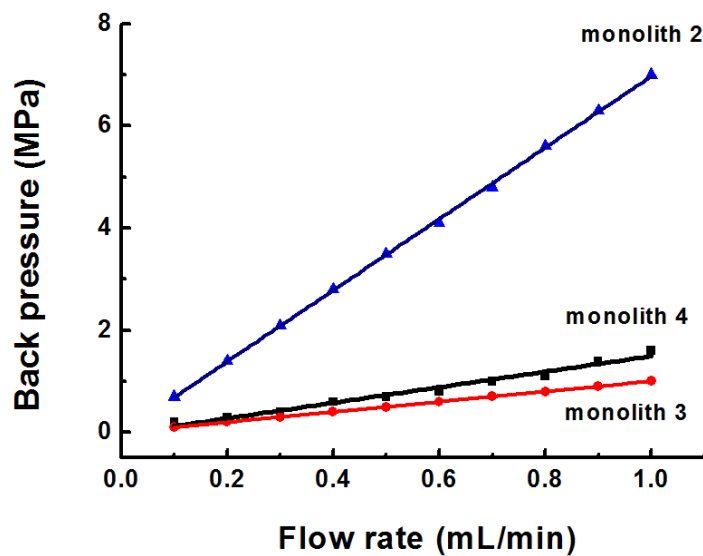

**Fig. S2.** Back pressures of monolith 2, monolith 3, and monolith 4 at different flow rates.

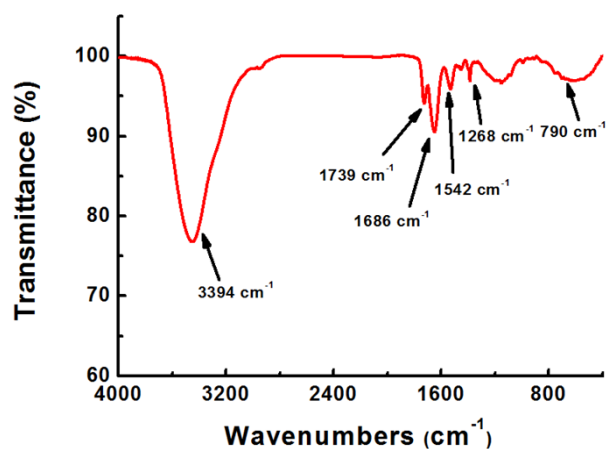

**Fig. S3.** FT-IR spectra of typical poly(MA<sub>L</sub>-Phe-OMe-co-MBA) monolith.

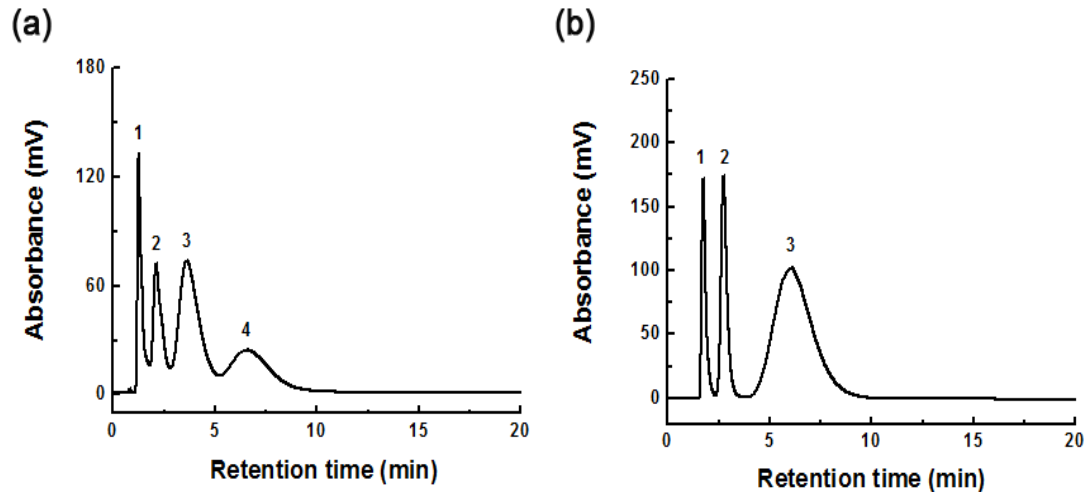

**Fig. S4.** Chromatograms for separations of (a) polycyclic aromatic hydrocarbons and (b) nucleobases/nucleosides on poly(MA<sub>L</sub>-Phe-OMe-co-MBA) monolith. Chromatographic conditions: column, monolith 2; mobile phase, ACN/water (60/40, v/v) for (a) and ACN/water (90/10, v/v) for (b); flow rate, 1.0 mL/min; detection, 254 nm. Peak: (a-1), toluene; (a-2), fluorene; (a-3), pyrene; (a-4), perylene; (b-1), uracil; (b-2), adenine; (b-3), 2'-deoxy guanosine.

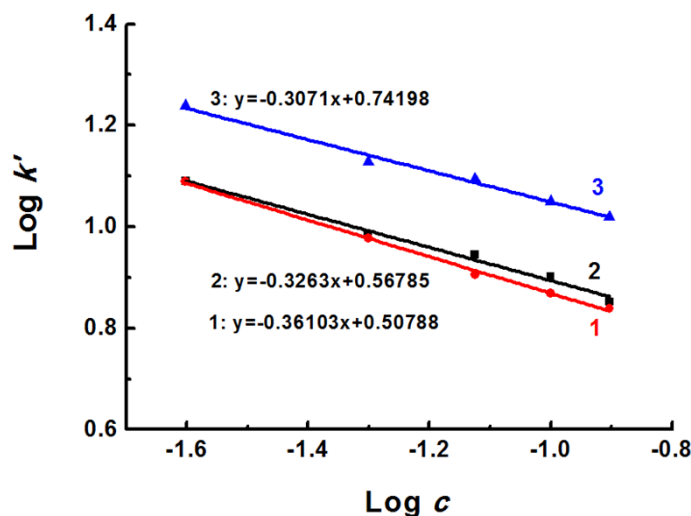

**Fig. S5.** Plots for  $\log k'$  vs.  $\log c$ .  $\log k'$ , where  $k'$  is the retention factor of benzoic acid.  $\log c$ , where  $c$  is the NaCl concentration in mobile phase. Chromatographic conditions: column, monolith 2; mobile phase, 20.0 mM sodium phosphate buffer (pH = 4.0) containing NaCl with various concentrations; flow rate, 1.0 mL/min; UV detection, 254 nm. Analytes: 1. niacin; 2. salicylic acid; 3. 4-chlorobenzoic acid.

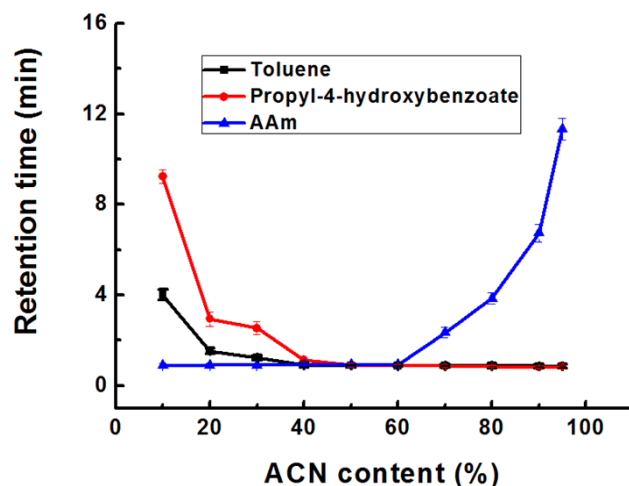

**Fig. S6.** Effect of ACN percentage on the retention times of toluene, propyl-4-hydroxybenzoate, and AAm on poly(N-methacryloyl-L-proline methyl ester-co-MBA) monolith. Chromatographic conditions: mobile phase, ACN-water; flow rate, 1.0 mL/min; UV detection, 254 nm. Error bars represent the standard deviations for three replicate determinations.

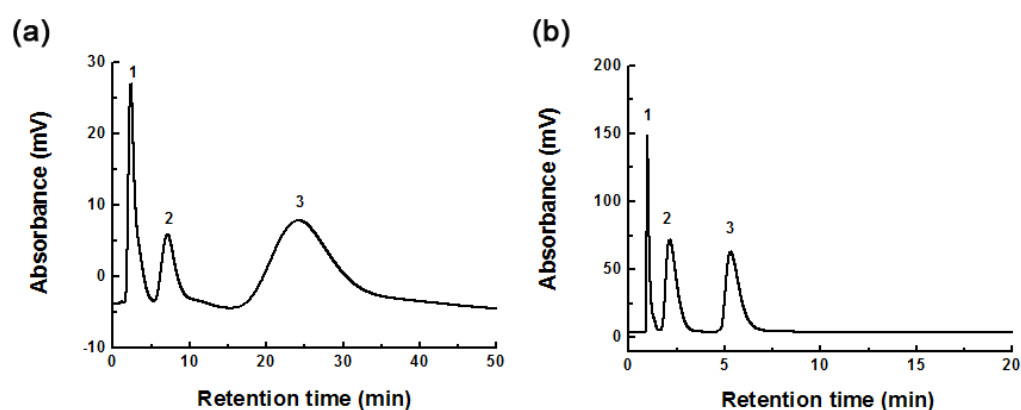

**Fig. S7.** Chromatograms for separations of (a) polycyclic aromatic hydrocarbons and (b) nucleobases/nucleosides on poly(N-methacryloyl-L-proline methyl ester-co-MBA) monolith. Chromatographic conditions: mobile phase, ACN/water (20/80, v/v) for (a) and ACN/water (85/15, v/v) for (b); flow rate, 1.0 mL/min; detection, 254 nm. Peak: (a-1), toluene; (a-2), fluorene; (a-3), pyrene; (b-1), uracil; (b-2), adenine; (b-3), 2'-deoxy guanosine.

**Table S2.** Chromatographic data of separations of polycyclic aromatic hydrocarbons on monoliths prepared with different monomer/crosslinker ratios

| Analytes        | Monolith 2<br>(40% monomer) |                    |      | Monolith 3<br>(0% monomer) |                    |      | Monolith 4<br>(20% monomer) |                    |      |
|-----------------|-----------------------------|--------------------|------|----------------------------|--------------------|------|-----------------------------|--------------------|------|
|                 | $t_R^a$<br>(min)            | $W_{0.5}$<br>(min) | R    | $t_R^a$<br>(min)           | $W_{0.5}$<br>(min) | R    | $t_R^a$<br>(min)            | $W_{0.5}$<br>(min) | R    |
| <b>Toluene</b>  | 1.26                        | 0.21               | 2.88 | 0.72                       | 0.22               | 2.14 | 1.14                        | 0.23               | 2.97 |
| <b>Fluorene</b> | 2.11                        | 0.38               | 1.79 | 1.32                       | 0.67               | 1.34 | 2.09                        | 0.56               | 1.27 |
| <b>Pyrene</b>   | 3.62                        | 1.31               | 1.79 | 2.80                       | 1.32               | 1.49 | 3.33                        | 1.39               | 1.50 |
| <b>Perylene</b> | 6.61                        | 2.02               |      | 4.33                       | 2.99               |      | 6.10                        | 2.30               |      |

<sup>a</sup> Chromatographic conditions: mobile phase, ACN/water (60/40, v/v) ; flow rate, 1.0 mL/min; detection, 254 nm.

**Table S3.** Chromatographic data of separations of nucleobases/nucleosides on monoliths prepared with different monomer/crosslinker ratios

| Analytes              | Monolith 2<br>(40% monomer) |                    |      | Monolith 3<br>(0% monomer) |                    |       | Monolith 4<br>(20% monomer) |                    |      |
|-----------------------|-----------------------------|--------------------|------|----------------------------|--------------------|-------|-----------------------------|--------------------|------|
|                       | $t_R^a$<br>(min)            | $W_{0.5}$<br>(min) | R    | $t_R^a$<br>(min)           | $W_{0.5}$<br>(min) | R     | $t_R^a$<br>(min)            | $W_{0.5}$<br>(min) | R    |
| Uracil                | 1.74                        | 0.22               | 2.13 | 2.33                       | 0.25               | 8.16  | 2.11                        | 0.23               | 6.94 |
| Adenine               | 2.74                        | 0.32               | 1.64 | 4.86                       | 0.37               | 12.21 | 3.99                        | 0.34               | 8.35 |
| 2'-deoxy<br>guanosine | 6.05                        | 1.51               |      | 17.32                      | 1.67               |       | 12.03                       | 1.59               |      |

<sup>a</sup> Chromatographic conditions: mobile phase, ACN/water (90/10, v/v) ; flow rate, 1.0 mL/min; detection, 254 nm.



**Table S4.** Repeatability of poly(MA-<sub>L</sub>-Phe-OMe-co-MBA) monolith for the retention times of the analytes

| Analytes                 | RSD (%)           |                        |
|--------------------------|-------------------|------------------------|
|                          | Run-to-run (N=5)  | Column-to-column (N=3) |
| Toluene                  | 2.12 <sup>a</sup> | 4.01 <sup>a</sup>      |
| propyl-4-hydroxybenzoate | 1.96 <sup>a</sup> | 3.08 <sup>a</sup>      |
| AAm                      | 2.59 <sup>b</sup> | 3.21 <sup>b</sup>      |

<sup>a</sup> Detected in mobile phase: water-ACN (10/90, v/v). <sup>b</sup> Detected in mobile phase: water-ACN (90/10, v/v).

**Table S5.** Chromatographic data of separations of proteins on poly(MA-L-Phe-OMe-co-MBA) monolith

| <b>Analytes</b> | <b>t<sub>R</sub> (min)</b> | <b>W<sub>0.5</sub> (min)</b> | <b>R</b> |
|-----------------|----------------------------|------------------------------|----------|
| <b>Con A</b>    | 3.66                       | 0.67                         | 5.09     |
| <b>Pep</b>      | 8.35                       | 1.17                         | 19.50    |
| <b>Ova</b>      | 17.56                      | 3.18                         | 1.48     |
| <b>HSA</b>      | 26.50                      | 3.33                         |          |
